# Supplementary material
Source: PubMed Central journal article supplement (PMC7887117)
Supplement: NIHMS1662804-supplement-SDC.pdf [file NIHMS1662804-supplement-SDC.pdf]

## SUPPLEMENTAL MATERIAL

**Supplemental Table I. Adjusted hazard ratios for additional variables in the overall model for cumulative post-transplant mortality.** In addition to the interaction term of race and age described in the text, we also adjusted for additional co-variates.

| Variables                                   | Adjusted Hazard Ratio |              |              | p-value |
|---------------------------------------------|-----------------------|--------------|--------------|---------|
| Female sex*                                 | 0.96                  | <b>1.04</b>  | 1.12         | 0.3     |
| Body mass index                             | <b>1.01</b>           | <b>1.01</b>  | 1.02         | <0.001  |
| Congenital heart disease vs. cardiomyopathy | <b>1.19</b>           | <b>1.43</b>  | 1.71         | <0.001  |
| Coronary artery disease vs. cardiomyopathy  | 0.94                  | 1.08         | 1.25         | 0.3     |
| Other vs. cardiomyopathy                    | 0.71                  | <b>0.87</b>  | 1.05         | 0.1     |
| Status 1B vs. 1A                            | 0.95                  | 1.02         | 1.08         | 0.7     |
| Status 2 vs. 1A                             | 0.98                  | 1.09         | 1.22         | 0.1     |
| Pulmonary arterial pressure, mmHg           | <b>1.001</b>          | <b>1.004</b> | <b>1.007</b> | <0.05   |
| Creatinine, mg/dL                           | <b>1.02</b>           | <b>1.03</b>  | 1.04         | <0.001  |
| Bilirubin, mg/dL                            | <b>1.02</b>           | <b>1.03</b>  | 1.04         | <0.001  |
| Diabetes mellitus                           | <b>1.09</b>           | <b>1.17</b>  | 1.25         | <0.001  |
| Hypertension                                | <b>1.10</b>           | <b>1.17</b>  | 1.24         | <0.001  |
| Ventilation                                 | <b>1.22</b>           | <b>1.47</b>  | 1.79         | <0.001  |
| VAD/TAH                                     | <b>1.12</b>           | <b>1.20</b>  | 1.28         | <0.001  |
| ECMO                                        | <b>1.67</b>           | <b>2.32</b>  | 3.24         | <0.001  |
| Dialysis                                    | <b>1.48</b>           | <b>1.76</b>  | 2.09         | <0.001  |
| Donor Age 21-30                             | 0.88                  | 0.96         | 1.05         | 0.4     |
| Donor Age 31-40                             | 0.99                  | 1.09         | 1.19         | 0.1     |
| Donor Age 41+                               | <b>1.20</b>           | <b>1.31</b>  | 1.43         | <0.001  |
| Donor race/ethnicity: Black                 | <b>1.03</b>           | <b>1.11</b>  | 1.21         | <0.01   |
| Donor race/ethnicity: Hispanic/Latino       | 0.96                  | 1.04         | 1.13         | 0.3     |
| Donor race/ethnicity: other                 | 0.93                  | 1.11         | 1.33         | 0.3     |
| Donor female sex                            | 0.92                  | <b>0.99</b>  | 1.07         | 0.8     |
| Donor cancer history                        | <b>1.08</b>           | <b>1.32</b>  | 1.61         | <0.01   |
| Donor INR                                   | 1.00                  | 1.02         | 1.04         | 0.1     |
| Ischemic time, min                          | <b>1.001</b>          | <b>1.001</b> | <b>1.002</b> | <0.001  |
| High center level volume <sup>†</sup>       | <b>0.64</b>           | <b>0.72</b>  | <b>0.81</b>  | <0.001  |
| Donor-recipient sex mismatch                | <b>1.01</b>           | <b>1.08</b>  | 1.16         | <0.05   |
| Era of transplant (2012-2017 vs. 2005-2011) | 0.90                  | 1.01         | 1.13         | 0.9     |
| Year of transplant                          | <b>0.95</b>           | <b>0.97</b>  | <b>0.98</b>  | <0.001  |

\*Among the heart transplant recipients in the study, the adjusted hazard ratio associated with female sex was 1.04, which was not significant (p=0.3). Significant adjusted hazard ratios are bolded. <sup>†</sup>High center level volume defined as  $\geq 9$  heart transplants/year. VAD/TAH = Ventricular Assist Device / Total Artificial Heart. ECMO = Extracorporeal Membrane Oxygenation.
